# Supplementary material for: Harmonized European Union subnational crop statistics reveal climate impacts and crop cultivation shifts
Source: Copernicus journal article supplement (doi:10.5194/essd-2023-439), 2023-11-08

Czechia:

| Region | Average production [1000 t]<br>(Reference period: 2000 – 2020) |               |               |             |           |            |
|--------|----------------------------------------------------------------|---------------|---------------|-------------|-----------|------------|
|        | Soft wheat                                                     | Winter barley | Spring barley | Grain maize | Sunflower | Sugar beet |
| CZ010  | 25.4                                                           | 1.2           | 8207.7        | 1.7         | 0         | 19.1       |
| CZ020  | 945.5                                                          | 111.5         | 257.3         | 110.4       | 12.7      | 977.3      |
| CZ031  | 410.5                                                          | 79            | 96.5          | 23.7        | 0.1       | 0          |
| CZ032  | 324.1                                                          | 85.2          | 63.5          | 14.6        | 1.4       | 0          |
| CZ041  | 31.4                                                           | 7.5           | 15.6          | 0.2         | 0         | 0          |
| CZ042  | 346.6                                                          | 24.6          | 93.5          | 27.7        | 6.2       | 194.7      |
| CZ051  | 62.4                                                           | 9.7           | 15.6          | 2           | 0         | 35.9       |
| CZ052  | 307.3                                                          | 43.8          | 48.7          | 41.3        | 0.6       | 586.9      |
| CZ053  | 273.5                                                          | 33.2          | 80.6          | 56.9        | 3.2       | 230.6      |
| CZ063  | 362.6                                                          | 56.7          | 172.4         | 20.3        | 0.3       | 14.2       |
| CZ064  | 588.9                                                          | 34.2          | 185.9         | 292.3       | 27.9      | 320.3      |
| CZ071  | 304.2                                                          | 16.6          | 176.4         | 57.1        | 0.3       | 695.5      |
| CZ072  | 184.2                                                          | 14.1          | 49.2          | 54.4        | 2         | 109.2      |
| CZ080  | 208.6                                                          | 26.8          | 65.8          | 30.3        | 0.3       | 367.1      |
| CZ     | 4405                                                           | 544.1         | 1329.3        | 733         | 550.9     | 3550.8     |

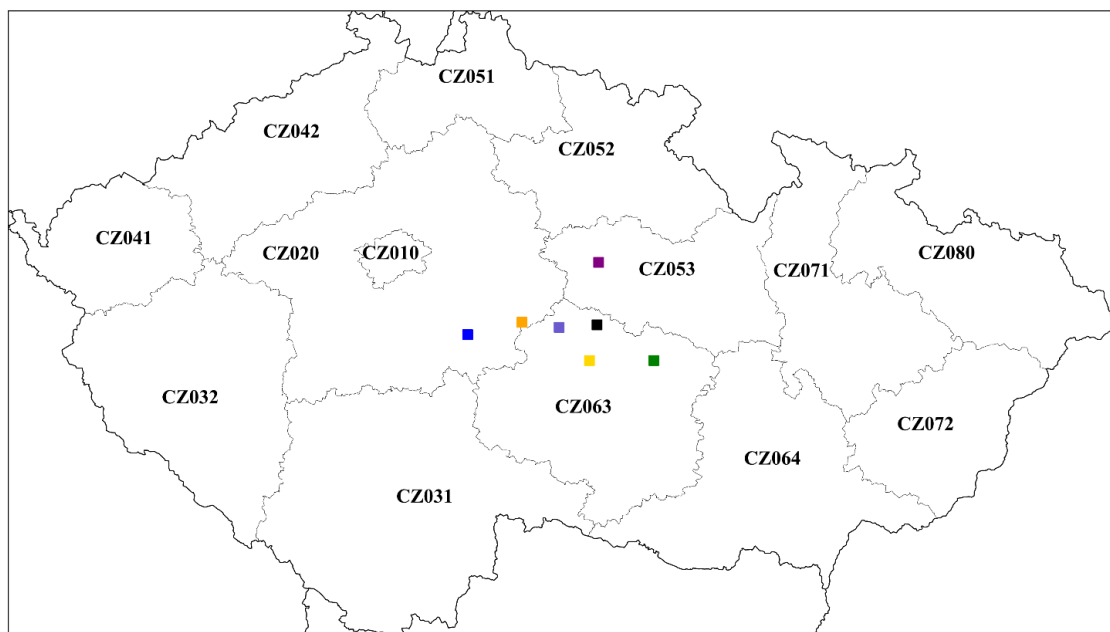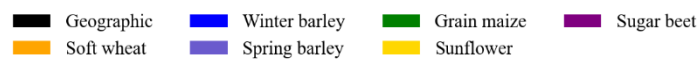

Bulgaria:

| Region | Average production [1000 t]<br>(Reference period: 2000 – 2020) |             |              |             |           |
|--------|----------------------------------------------------------------|-------------|--------------|-------------|-----------|
|        | Soft wheat                                                     | Durum wheat | Total barley | Grain maize | Sunflower |
| BG31   | 1111.7                                                         | 1.5         | 107.1        | 584.6       | 310.2     |
| BG32   | 1140.6                                                         | 0.5         | 169.9        | 535.4       | 320.0     |
| BG33   | 1352.2                                                         | 7.7         | 157.7        | 713.4       | 365.9     |
| BG34   | 941.9                                                          | 29.9        | 201.7        | 37.1        | 190.2     |
| BG41   | 150.6                                                          | 2           | 56.9         | 48.9        | 54.6      |
| BG42   | 397.9                                                          | 19.9        | 38.2         | 40.6        | 81.2      |
| BG     | 5095.1                                                         | 61.4        | 731.7        | 1959.9      | 1322.1    |

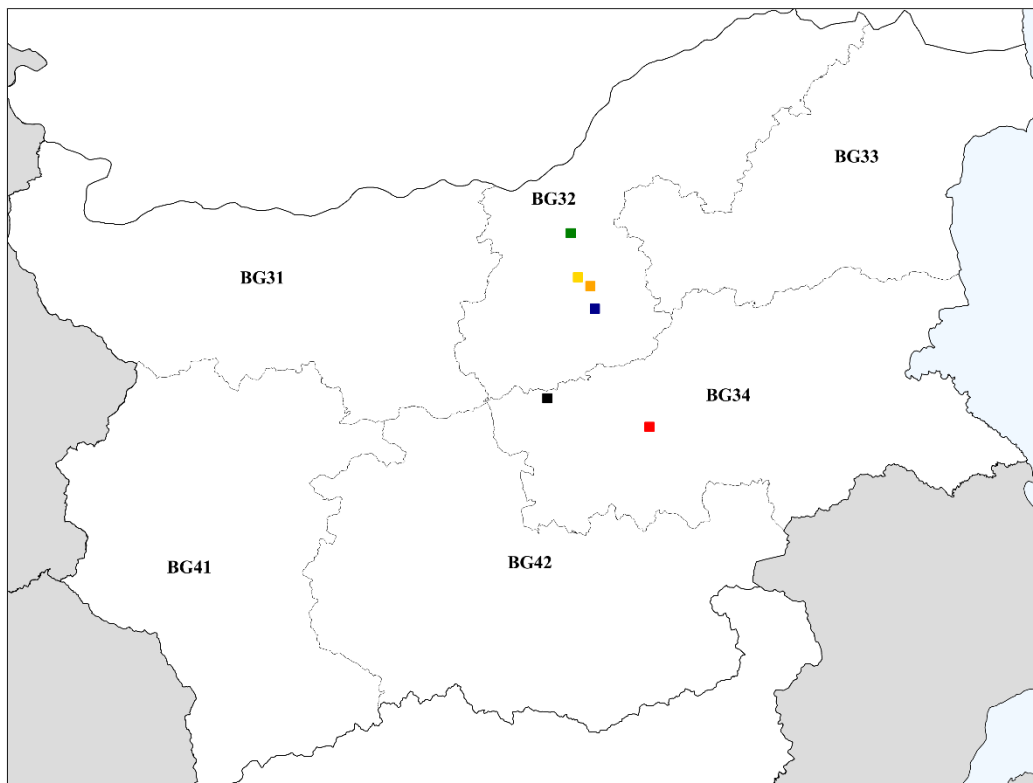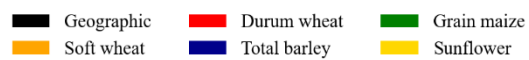

Supplement: Supplementary file [file essd-2023-439-AC2-supplement.pdf]
