# Supplementary material for: Harmonized European Union subnational crop statistics reveal climate impacts and crop cultivation shifts
Source: Copernicus journal article supplement (doi:10.5194/essd-2023-439), 2023-11-08
Supplement: Supplementary file [file essd-2023-439-AC1-supplement.pdf]

**Table 1.** Rules implemented for calculating new values and convert zero as null.

| Available variables: |            | Yield to be calculated: |       |
|----------------------|------------|-------------------------|-------|
| AREA                 | PRODUCTION | 0                       | NA    |
| 0                    | 0          | 0                       | 0**   |
|                      | NA         | 0                       | NA    |
|                      | Value      | NA*                     | NA    |
| NA                   | 0          | 0                       | NA    |
|                      | NA         | NA*                     | NA    |
|                      | Value      | NA*                     | NA    |
| Value                | 0          | NA                      | NA    |
|                      | NA         | NA                      | NA    |
|                      | Value      | P/A**                   | P/A** |

| Available variables: |       | Production to be calculated: |       |
|----------------------|-------|------------------------------|-------|
| AREA                 | YIELD | 0                            | NA    |
| 0                    | 0     | 0                            | 0**   |
|                      | NA    | 0                            | NA    |
|                      | Value | NA*                          | NA    |
| NA                   | 0     | 0                            | NA    |
|                      | NA    | NA*                          | NA    |
|                      | Value | NA*                          | NA    |
| Value                | 0     | NA                           | NA    |
|                      | NA    | NA                           | NA    |
|                      | Value | AxY**                        | AxY** |

| Available variables: |            | Area to be calculated: |       |
|----------------------|------------|------------------------|-------|
| YIELD                | PRODUCTION | 0                      | NA    |
| 0                    | 0          | 0                      | 0**   |
|                      | NA         | 0                      | NA    |
|                      | Value      | NA*                    | NA    |
| NA                   | 0          | 0                      | NA    |
|                      | NA         | NA*                    | NA    |
|                      | Value      | NA*                    | NA    |
| Value                | 0          | NA                     | NA    |
|                      | NA         | NA                     | NA    |
|                      | Value      | P/Y**                  | P/Y** |

\* ZERO\_AS\_NULL = Yes; \*\* CALCULATED\_V = Yes; NA = Not Available

**Table 2.** Rules implemented for calculating new values for total wheat or total barley.

| <b>AREA</b>  |              |                           |
|--------------|--------------|---------------------------|
| <b>Crop1</b> | <b>Crop2</b> | <b>Total</b>              |
| <i>0</i>     | <i>0</i>     | <i>0*</i>                 |
|              | <i>NA</i>    | <i>NA</i>                 |
|              | <i>Value</i> | $A_{crop1} + A_{crop2}^*$ |
| <i>NA</i>    | <i>0</i>     | <i>NA</i>                 |
|              | <i>NA</i>    | <i>NA</i>                 |
|              | <i>Value</i> | <i>NA</i>                 |
| <i>Value</i> | <i>0</i>     | $A_{crop1} + A_{crop2}^*$ |
|              | <i>NA</i>    | <i>NA</i>                 |
|              | <i>Value</i> | $A_{crop1} + A_{crop2}^*$ |

| <b>PRODUCTION</b> |              |                           |
|-------------------|--------------|---------------------------|
| <b>Crop1</b>      | <b>Crop2</b> | <b>Total</b>              |
| <i>0</i>          | <i>0</i>     | <i>0*</i>                 |
|                   | <i>NA</i>    | <i>NA</i>                 |
|                   | <i>Value</i> | $P_{crop1} + P_{crop2}^*$ |
| <i>NA</i>         | <i>0</i>     | <i>NA</i>                 |
|                   | <i>NA</i>    | <i>NA</i>                 |
|                   | <i>Value</i> | <i>NA</i>                 |
| <i>Value</i>      | <i>0</i>     | $P_{crop1} + P_{crop2}^*$ |
|                   | <i>NA</i>    | <i>NA</i>                 |
|                   | <i>Value</i> | $P_{crop1} + P_{crop2}^*$ |

| <b>YIELD</b>                |                                   |                                                                             |
|-----------------------------|-----------------------------------|-----------------------------------------------------------------------------|
| <b>Area<sub>total</sub></b> | <b>Production<sub>total</sub></b> | <b>Yield<sub>total</sub></b>                                                |
| <i>0</i>                    | <i>0</i>                          | <i>0*</i>                                                                   |
|                             | <i>NA</i>                         | <i>NA</i>                                                                   |
|                             | <i>Value</i>                      | <i>NA</i>                                                                   |
| <i>NA</i>                   | <i>0</i>                          | <i>NA</i>                                                                   |
|                             | <i>NA</i>                         | <i>NA</i>                                                                   |
|                             | <i>Value</i>                      | <i>NA</i>                                                                   |
| <i>Value</i>                | <i>0</i>                          | $P_{total}/A_{total}^*$                                                     |
|                             | <i>NA</i>                         | $[(A_{crop1} \times Y_{crop1}) + (A_{crop2} \times Y_{crop2})]/A_{total}^*$ |
|                             | <i>Value</i>                      | $P_{total}/A_{total}^*$                                                     |

\* CALCULATED\_V = Yes; NA = Not Available

**Table 3.** Rules implemented for checking agreement among values of Area, Production and Yield.

| <b>COHERENCE_APY</b>              |                                |                    |
|-----------------------------------|--------------------------------|--------------------|
| Yes                               | No                             | NA                 |
| $\text{abs}(P-(AxY)) \leq 0.01xP$ | $\text{abs}(P-(AxY)) > 0.01xP$ | Any variable is NA |

**Table 4.** Rules implemented for checking agreement among values of Total wheat (Total barley), Soft wheat (Winter barley), and Durum wheat (Spring barley).

| <b>COHERENCE_CROP - Area</b>                                                                    |                                                                                              |                |
|-------------------------------------------------------------------------------------------------|----------------------------------------------------------------------------------------------|----------------|
| Yes                                                                                             | No                                                                                           | NA             |
| $\text{abs}(A_{\text{total}}-(A_{\text{crop1}} + A_{\text{crop2}})) \leq 0.01xA_{\text{total}}$ | $\text{abs}(A_{\text{total}}-(A_{\text{crop1}} + A_{\text{crop2}})) > 0.01xA_{\text{total}}$ | Any crop is NA |

| <b>COHERENCE_CROP - Production</b>                                                              |                                                                                              |                |
|-------------------------------------------------------------------------------------------------|----------------------------------------------------------------------------------------------|----------------|
| Yes                                                                                             | No                                                                                           | NA             |
| $\text{abs}(P_{\text{total}}-(P_{\text{crop1}} + P_{\text{crop2}})) \leq 0.01xP_{\text{total}}$ | $\text{abs}(P_{\text{total}}-(P_{\text{crop1}} + P_{\text{crop2}})) > 0.01xP_{\text{total}}$ | Any crop is NA |

| <b>COHERENCE_CROP - Yield</b>                                                                                                                            |                                                                                                                                                       |                |
|----------------------------------------------------------------------------------------------------------------------------------------------------------|-------------------------------------------------------------------------------------------------------------------------------------------------------|----------------|
| Yes                                                                                                                                                      | No                                                                                                                                                    | NA             |
| $\text{abs}(Y_{\text{total}} - [(Y_{\text{crop1}}xA_{\text{crop1}} + Y_{\text{crop2}}xA_{\text{crop2}}) / A_{\text{total}}]) \leq 0.01xY_{\text{total}}$ | $\text{abs}(Y_{\text{total}} - [(Y_{\text{crop1}}xA_{\text{crop1}} + Y_{\text{crop2}}xA_{\text{crop2}}) / A_{\text{total}}]) > 0.01xY_{\text{total}}$ | Any crop is NA |
